# Supplementary material
Source: PubMed Central journal article supplement (PMC5867659)

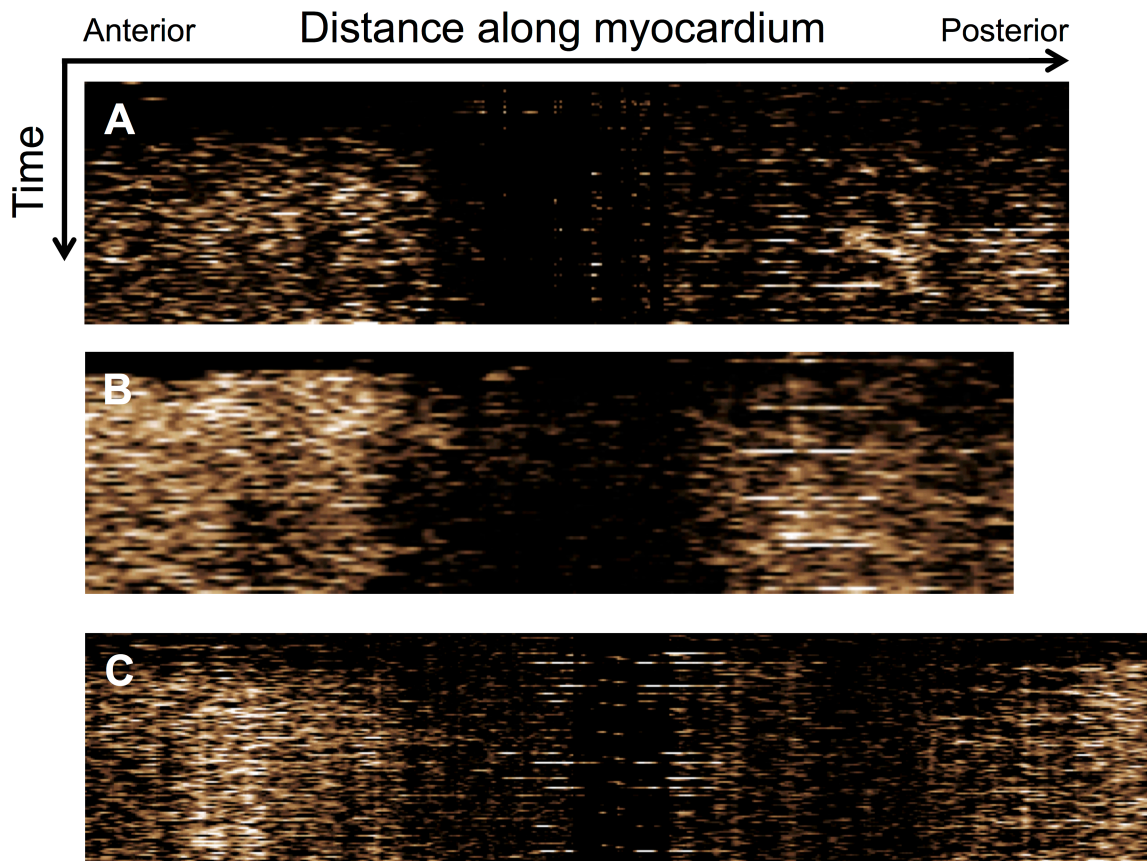

Supplementary Figure 1

Supplement: suppl-figure-s1.pdf [file suppl-figure-s1.pdf]
